# Supplementary material for: Glycosylation defects, offset by PEPCK-M, drive entosis in breast carcinoma cells
Source: PubMed Central journal article supplement (PMC9402552; doi:10.1038/s41419-022-05177-x), 2022-08-24

Figure S1

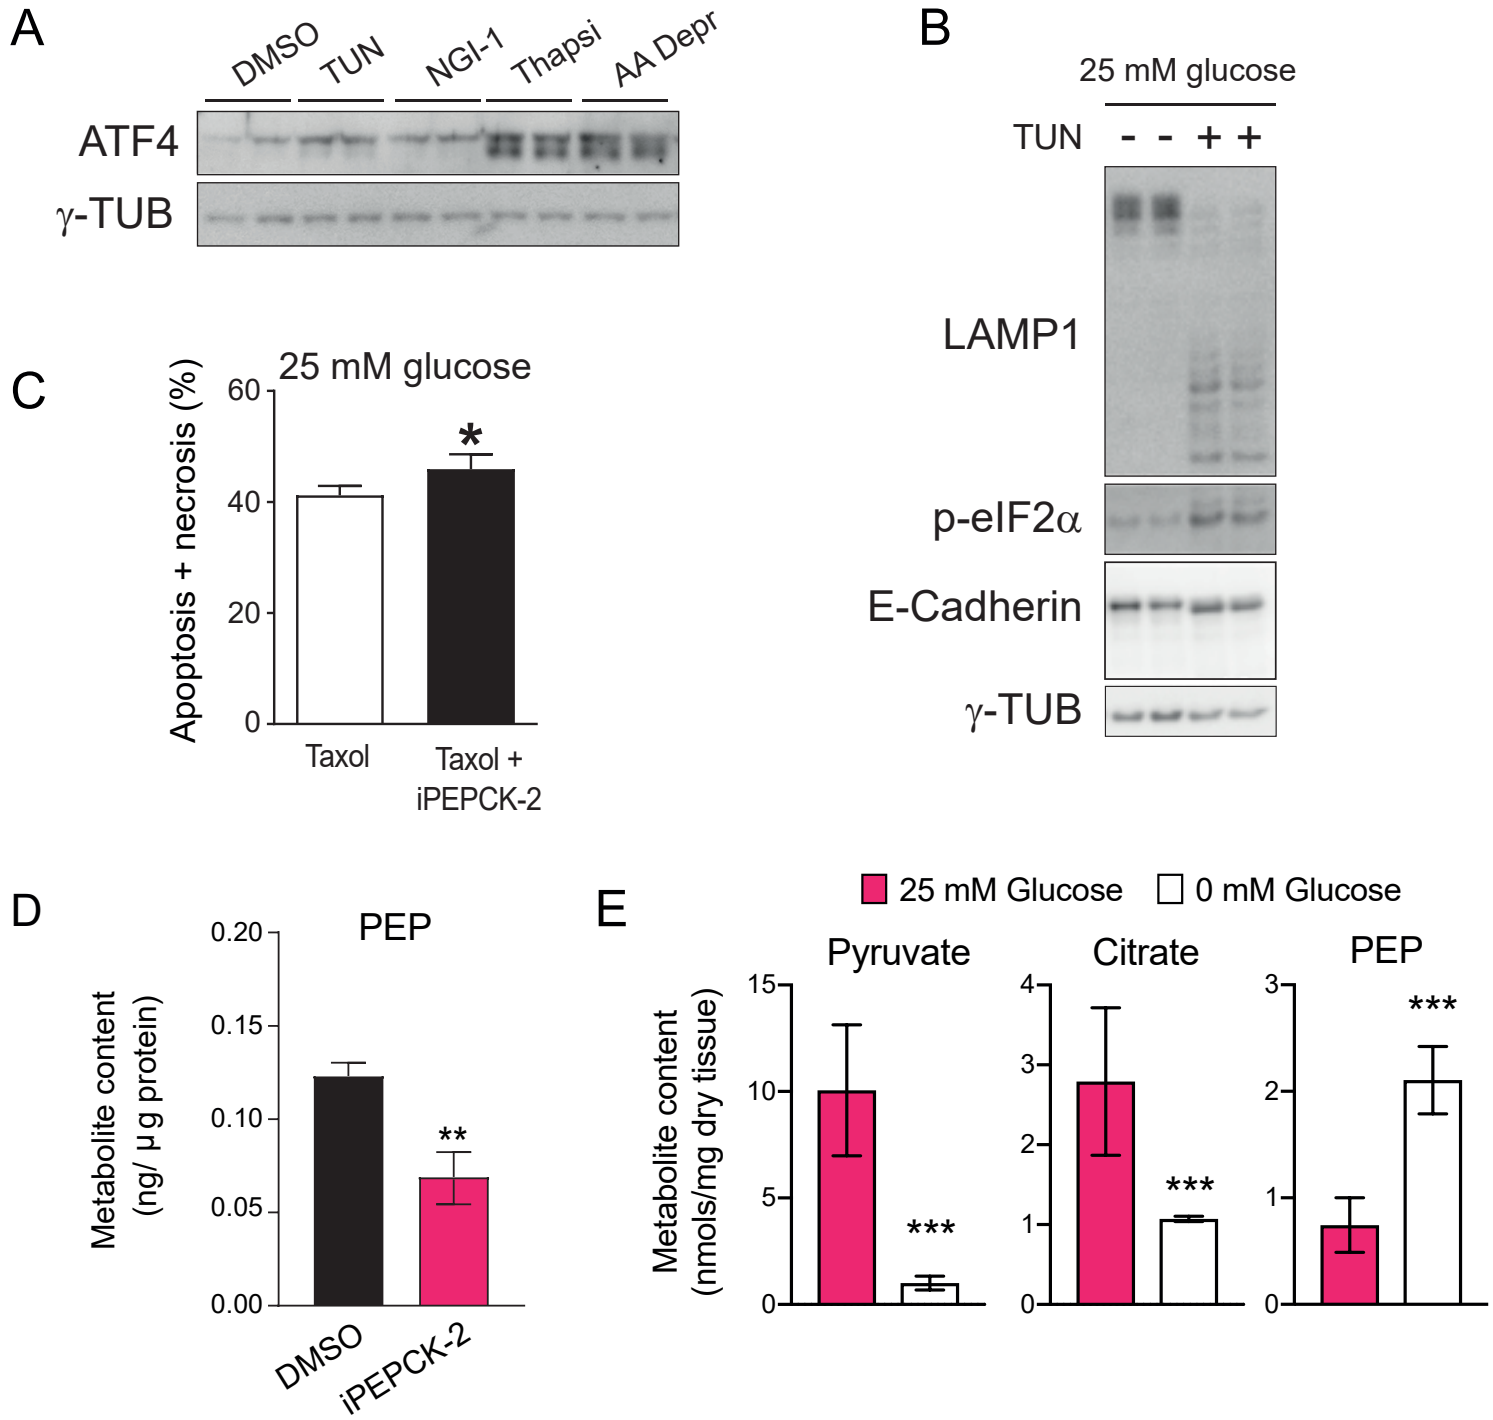

Supplement: 41419_2022_5177_MOESM2_ESM.pdf [file 41419_2022_5177_MOESM2_ESM.pdf]
